# Supplementary material
Source: publisher site journal article supplement (https://www.spandidos-publications.com/2465/downloadSupplementary)
Supplement: Supplementary file 1 [file downloadSupplementary]

## Sheet: TargetScan7
Table SI. TargetScan predicted all miRNAs which had binding sites with TYROBP.
miRNA	Position in the UTR	seed match	context++ score	context++ score percentile	weighted context++ score	conserved branch length	%
hsa-miR-628-5p	16-23	8mer	-0.75	99	-0.75	0.072	N/A
hsa-miR-96-3p	23-30	8mer	-0.63	99	-0.63	0	N/A
hsa-miR-2681-3p	24-30	7mer-1A	-0.22	94	-0.22	0	N/A
hsa-miR-1287-5p	36-42	7mer-m8	-0.35	98	-0.35	0	N/A
hsa-miR-3652	37-44	8mer	-0.71	99	-0.71	0	N/A
hsa-miR-4430	37-44	8mer	-0.7	99	-0.7	0	N/A
hsa-miR-6842-3p	38-44	7mer-m8	-0.42	98	-0.42	0	N/A
hsa-miR-5787	38-44	7mer-1A	-0.24	95	-0.24	0	N/A
hsa-miR-4505	38-44	7mer-1A	-0.28	94	-0.28	0	N/A
hsa-miR-889-5p	39-45	7mer-m8	-0.37	98	-0.37	0.072	N/A
hsa-miR-873-5p.1	45-51	7mer-1A	-0.14	95	-0.14	2.936	N/A
hsa-miR-27a-5p	51-57	7mer-1A	-0.34	97	-0.34	0.072	N/A
hsa-miR-4417	52-58	7mer-m8	-0.38	98	-0.38	0	N/A
hsa-miR-654-5p	53-59	7mer-m8	-0.5	99	-0.5	0.072	N/A
hsa-miR-541-3p	53-59	7mer-m8	-0.51	99	-0.51	0.072	N/A
hsa-miR-6766-5p	54-60	7mer-m8	-0.41	97	-0.41	0	N/A
hsa-miR-6756-5p	54-60	7mer-m8	-0.43	97	-0.43	0	N/A
hsa-miR-1909-3p	58-64	7mer-1A	-0.31	95	-0.31	0	N/A
hsa-miR-6132	58-64	7mer-1A	-0.27	93	-0.27	0.021	N/A
hsa-miR-6722-3p	58-64	7mer-1A	-0.29	93	-0.29	0	N/A
hsa-miR-6836-5p	58-64	7mer-1A	-0.28	93	-0.28	0.021	N/A
hsa-miR-7854-3p	63-69	7mer-1A	-0.3	97	-0.3	0	N/A
hsa-miR-6134	63-69	7mer-1A	-0.25	90	-0.25	0.021	N/A
hsa-miR-206	68-74	7mer-1A	-0.24	93	-0.24	0.201	< 0.1
hsa-miR-1-3p	68-74	7mer-1A	-0.23	92	-0.23	0.201	< 0.1
hsa-miR-613	68-74	7mer-1A	-0.23	92	-0.23	0.201	< 0.1
hsa-miR-6505-5p	69-75	7mer-1A	-0.2	94	-0.2	0.072	N/A
hsa-miR-571	72-78	7mer-m8	-0.44	98	-0.44	0.021	N/A
hsa-miR-4433b-3p	75-81	7mer-1A	-0.31	97	-0.31	0	N/A
hsa-miR-579-5p	81-87	7mer-1A	-0.55	98	-0.55	0	N/A
hsa-miR-4742-3p	87-93	7mer-1A	-0.15	87	-0.15	0	N/A
hsa-miR-7107-3p	89-95	7mer-m8	-0.39	97	-0.39	0	N/A
hsa-miR-6753-3p	89-95	7mer-m8	-0.4	97	-0.4	0	N/A
hsa-miR-193a-5p	91-97	7mer-1A	-0.28	95	-0.28	0.544	< 0.1
hsa-miR-6759-5p	93-99	7mer-m8	-0.33	97	-0.33	0	N/A
hsa-miR-6793-5p	93-99	7mer-1A	-0.27	93	-0.27	0	N/A
hsa-miR-6748-5p	93-99	7mer-1A	-0.25	87	-0.25	0	N/A
hsa-miR-134-3p	94-101	8mer	-0.7	99	-0.7	0	N/A
hsa-miR-7114-5p	95-101	7mer-1A	-0.25	95	-0.25	0.415	N/A
hsa-miR-3664-5p	97-103	7mer-m8	-0.23	96	-0.23	0.31	N/A
hsa-miR-183-5p.2	101-107	7mer-m8	-0.33	96	-0.33	0.051	< 0.1
hsa-miR-183-5p.1	102-108	7mer-m8	-0.36	97	-0.36	0.051	< 0.1
hsa-miR-6757-5p	106-112	7mer-m8	-0.28	95	-0.28	0	N/A
hsa-miR-4441	108-114	7mer-1A	-0.27	96	-0.27	0	N/A
hsa-miR-6754-5p	108-114	7mer-1A	-0.24	95	-0.24	0	N/A
hsa-miR-211-3p	108-114	7mer-1A	-0.16	93	-0.16	0	N/A
hsa-miR-4270	108-114	7mer-1A	-0.21	92	-0.21	0	N/A
hsa-miR-1266-5p	109-116	8mer	-0.67	99	-0.67	0.021	N/A
hsa-miR-4518	109-116	8mer	-0.61	99	-0.61	0.021	N/A
hsa-miR-3664-3p	110-116	7mer-1A	-0.23	96	-0.23	0	N/A
hsa-miR-6895-3p	113-119	7mer-m8	-0.39	98	-0.39	0	N/A
hsa-miR-6848-3p	115-121	7mer-m8	-0.28	98	-0.28	0	N/A
hsa-miR-6843-3p	115-121	7mer-m8	-0.34	98	-0.34	0	N/A
hsa-miR-3663-5p	116-123	8mer	-0.53	99	-0.53	0	N/A
hsa-miR-7152-3p	117-123	7mer-1A	-0.28	94	-0.28	0	N/A
hsa-miR-6090	125-131	7mer-m8	-0.43	99	-0.43	0	N/A
hsa-miR-1343-5p	126-133	8mer	-0.8	99	-0.8	0	N/A
hsa-miR-939-5p	126-133	8mer	-0.82	99	-0.82	0	N/A
hsa-miR-3150a-3p	127-134	8mer	-0.73	99	-0.73	0.072	N/A
hsa-miR-6763-5p	127-134	8mer	-0.75	99	-0.75	0.072	N/A
hsa-miR-3175	127-133	7mer-1A	-0.34	96	-0.34	0	N/A
hsa-miR-6825-5p	127-133	7mer-1A	-0.29	88	-0.29	0	N/A
hsa-miR-450a-2-3p	128-134	7mer-m8	-0.37	97	-0.37	0.072	N/A
hsa-miR-6857-5p	128-134	7mer-1A	-0.29	97	-0.29	0	N/A
hsa-miR-2110	128-134	7mer-1A	-0.28	96	-0.28	0	N/A
hsa-miR-6810-5p	128-134	7mer-1A	-0.25	94	-0.25	0	N/A
hsa-miR-496.1	133-139	7mer-m8	-0.29	94	-0.29	0.045	N/A
hsa-miR-5192	136-142	7mer-m8	-0.48	99	-0.48	0	N/A
hsa-miR-6888-5p	138-144	7mer-1A	-0.3	98	-0.3	0	N/A
hsa-miR-4266	139-145	7mer-1A	-0.38	97	-0.38	0	N/A
hsa-miR-651-5p	140-146	7mer-1A	-0.26	96	-0.26	0.021	N/A
hsa-miR-6516-3p	151-157	7mer-1A	-0.34	98	-0.34	0	N/A
hsa-miR-3977	154-160	7mer-m8	-0.42	99	-0.42	0	N/A
hsa-miR-218-5p	156-163	8mer	-0.82	99	-0.82	0.341	< 0.1
hsa-miR-636	156-162	7mer-1A	-0.32	97	-0.32	0.072	N/A
hsa-miR-2113	158-165	8mer	-0.84	99	-0.84	0	N/A
hsa-miR-5010-3p	159-165	7mer-1A	-0.26	97	-0.26	0	N/A
